# Supplementary material for: Design and Implementation of a Smart Insole System to Measure Plantar Pressure and Temperature
Source: MDPI journal article supplement (doi:10.3390/s22197599), 2022-10-07
Supplement: s1 [file s1]

## Supplementary Materials

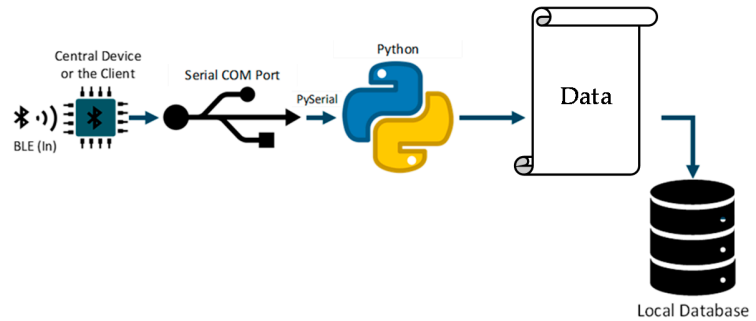

Supplementary Figure S1: Block Diagram: Text-Based Data Logger.

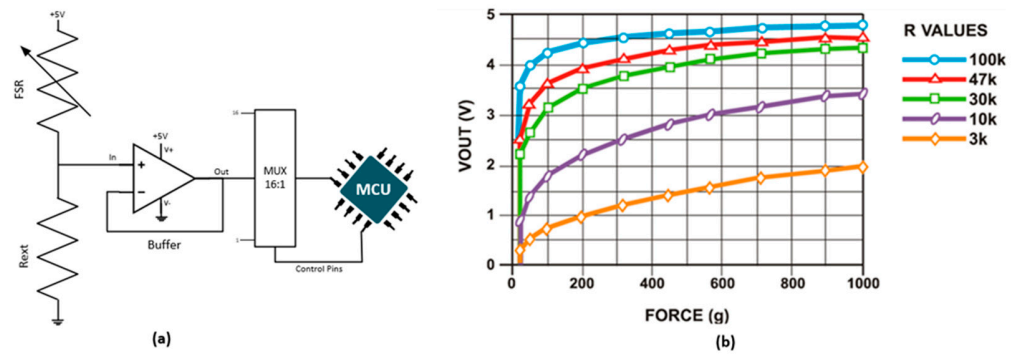

Supplementary Figure S2: (a) Voltage Divider Circuit to take FSR Measurements, (b) Voltage Output Response for Different Values of Pull-Down (or Pull-Up) Resistor with Response to Force Applied on the FSR [42].
